# Supplementary material for: Forward Left Ventricular Ejection Fraction: A Simple Risk Marker in Patients With Primary Mitral Regurgitation
Source: PubMed Central journal article supplement — J Am Heart Assoc. 2017 Oct 27;6(11):e006309. doi: 10.1161/JAHA.117.006309 (PMC5721745; doi:10.1161/jaha.117.006309), 2017-10-27

**Online Supplementary Data for the following article:**

**Forward Left Ventricular Ejection Fraction: A Simple Risk Marker in Patients with Primary Mitral Regurgitation**

Marlène Dupuis; Haïfa Mahjoub, MD, PhD; Marie-Annick Clavel, DVM, PhD; Nancy Côté, PhD; Oumhani Toubal, MD; Lionel Tastet, MSc; Jean G. Dumesnil, MD; Kim O'Connor, MD; Abdellaziz Dahou, MD, MSc; Christophe Thébault, MD; Catherine Bélanger, DVM; Jonathan Beaudoin, MD; Marie Arsenault, MD; Mathieu Bernier, MD; Philippe Pibarot, DVM, PhD

**Online Table 1:** Univariable predictors of Clinical Events, Mortality, and Mortality under Conservative Management

| Variable                         | Increment       | MV surgery or mortality |         | All-cause mortality |         | All-cause mortality under medical treatment |         |
|----------------------------------|-----------------|-------------------------|---------|---------------------|---------|---------------------------------------------|---------|
|                                  |                 | HR (95% CI)             | p Value | HR (95% CI)         | p Value | HR (95% CI)                                 | p Value |
| <b>Age</b>                       | 1 year Increase | 1.02 (1.00-1.03)        | 0.006   | 1.10 (1.07-1.13)    | <0.0001 | 1.11 (1.07-1.15)                            | <0.0001 |
| <b>Male</b>                      |                 | 1.62 (1.16-2.28)        | 0.005   | 1.04 (0.64-1.70)    | 0.89    | 1.11 (0.64-1.94)                            | 0.71    |
| <b>Hypertension</b>              |                 | 1.19 (0.85-1.66)        | 0.31    | 1.74 (1.04-3.00)    | 0.03    | 1.60 (0.89-2.97)                            | 0.12    |
| <b>Diabetes</b>                  |                 | 1.33 (0.72-2.27)        | 0.34    | 2.27 (1.25-4.37)    | 0.04    | 2.26 (0.92-4.71)                            | 0.07    |
| <b>Dyslipidemia</b>              |                 | 1.12 (0.80-1.56)        | 0.49    | 1.91 (1.16-3.16)    | 0.01    | 1.57 (0.88-2.79)                            | 0.13    |
| <b>History of smoking</b>        |                 | 1.08 (0.75-1.54)        | 0.66    | 2.08 (1.24-3.49)    | 0.006   | 1.96 (1.08-3.55)                            | 0.03    |
| <b>Coronary artery disease</b>   |                 | 1.71 (1.20-2.41)        | 0.003   | 3.28 (1.96-5.50)    | <0.0001 | 3.92 (2.15-7.22)                            | <0.0001 |
| <b>Atrial fibrillation</b>       |                 | 1.45 (0.99-2.08)        | 0.06    | 2.44 (1.44-4.03)    | 0.001   | 2.67 (1.46-4.78)                            | 0.002   |
| <b>Charlson index</b>            |                 | 0.51 (0.32-0.82)        | 0.006   | 0.03 (0.01-0.07)    | <0.0001 | 0.02 (0.001-0.06)                           | <0.0001 |
| <b>ACE inhibitors</b>            |                 | 1.64 (1.17-2.28)        | 0.005   | 2.05 (1.24-3.38)    | 0.005   | 2.32 (1.30-4.12)                            | 0.005   |
| <b>ARB</b>                       |                 | 0.87 (0.55-1.32)        | 0.53    | 0.94 (0.46-1.73)    | 0.85    | 1.09 (0.51-2.10)                            | 0.81    |
| <b>β-Blockers</b>                |                 | 1.26 (0.87-1.80)        | 0.21    | 2.42 (1.45-3.97)    | 0.0008  | 2.12 (1.17-3.76)                            | 0.01    |
| <b>Diuretics</b>                 |                 | 1.15 (0.81-1.63)        | 0.43    | 4.16 (2.51-7.00)    | <0.0001 | 4.17 (2.33-7.73)                            | <0.0001 |
| <b>LV end-diastolic diameter</b> | 5 mm Increase   | 1.47 (1.27-1.71)        | <0.0001 | 0.93 (0.76-1.14)    | 0.49    | 0.94 (0.74-1.22)                            | 0.67    |

|                                          |                              |                   |         |                   |         |                    |         |
|------------------------------------------|------------------------------|-------------------|---------|-------------------|---------|--------------------|---------|
| <b>Indexed LV end-diastolic diameter</b> | 1mm/m <sup>2</sup> Increase  | 1.09 (1.04-1.13)  | 0.0006  | 1.03 (0.96-1.10)  | 0.36    | 1.08 (1.00-1.17)   | 0.06    |
| <b>LV end-systolic diameter</b>          | 5 mm Increase                | 1.33 (1.14-1.55)  | 0.0003  | 1.09 (0.88-1.34)  | 0.43    | 1.11 (0.84-1.47)   | 0.46    |
| <b>Indexed LV end-systolic diameter</b>  | 1mm/m <sup>2</sup> Increase  | 1.09 (1.03-1.14)  | 0.002   | 1.08 (1.01-1.15)  | 0.03    | 1.14 (1.04-1.24)   | 0.007   |
| <b>LA diameter</b>                       | 5 mm Increase                | 1.35 (1.23-1.48)  | <0.0001 | 1.31 (1.16-1.48)  | <0.0001 | 1.37 (1.17-1.59)   | 0.0003  |
| <b>Indexed LA diameter</b>               | 1mm/m <sup>2</sup> Increase  | 1.09 (1.05-1.12)  | <0.0001 | 1.12(1.07-1.17)   | <0.0001 | 1.15 (1.09-1.20)   | <0.0001 |
| <b>Mild MR</b>                           |                              | Ref               |         | Ref               |         | Ref                |         |
| <b>Moderate MR</b>                       |                              | 2.61 (1.73-4.00)  | <0.0001 | 1.22 (0.69-2.16)  | 0.50    | 1.54 (0.79-3.53)   | 0.21    |
| <b>Severe MR</b>                         |                              | 7.11 (4.48-11.39) | <0.0001 | 2.62 (1.38-4.93)  | 0.004   | 6.07 (2.88-12.75)  | <0.0001 |
| <b>LV stroke volume</b>                  | 10 mL Decrease               | 1.14 (1.02-1.26)  | 0.02    | 1.32 (1.12-1.57)  | 0.0007  | 1.47 (1.22-1.78)   | <0.0001 |
| <b>Indexed LV Stroke volume</b>          | 5 mL/m <sup>2</sup> Decrease | 1.20 (1.09-1.33)  | 0.0003  | 1.27 (1.09-1.49)  | 0.003   | 1.37 (1.15-1.63)   | 0.0003  |
| <b>LV cardiac output</b>                 | 0.2 L/min Decrease           | 1.81 (0.88-3.81)  | 0.11    | 5.38 (1.72-18.09) | 0.004   | 12.35 (3.22-51.13) | 0.0002  |
| <b>Total LVEF (Simpson's method)</b>     | 5% Decrease                  | 1.07 (0.89-1.28)  | 0.49    | 1.26 (0.96-1.68)  | 0.10    | 1.23 (0.91-1.72)   | 0.19    |
| <b>Forward LVEF (Dumesnil method)</b>    | 5% Decrease                  | 1.21 (1.14-1.29)  | <0.0001 | 1.13(1.03-1.23)   | 0.008   | 1.19 (1.07-1.33)   | 0.0006  |
| <b>Global longitudinal strain</b>        | 5% Increase                  | 1.16 (0.76-1.75)  | 0.50    | 2.73 (1.39-5.34)  | 0.004   | 2.76 (1.32-5.79)   | 0.007   |
| <b>Trans-tricuspid gradient</b>          | 5mmHg Increase               | 1.13 (1.05-1.22)  | 0.002   | 1.33(1.21-1.45)   | <0.0001 | 1.31(1.17-1.45)    | <0.0001 |

ACE= angiotensin converting enzyme inhibitors; ARB = angiotensin receptor blockers; LA= left atrial; LV = left ventricular; LVEF = left ventricular ejection fraction; MR = mitral regurgitation; MV = mitral valve

**ONLINE FIGURE LEGENDS****Online Figure 1:** Overall Survival in Patients with MR According to Baseline

Echocardiographic Parameters

*Caption:* This figure shows the overall survival curves according to various echocardiographic parameters of MR severity and LV function.

Abbreviations: LA = Left atrial; LVES = Left Ventricular End-Systolic; LVEF = Left Ventricular Ejection Fraction; LVSV= Left Ventricular Stroke Volume; MR = Mitral Regurgitation.

**Online Figure 2:** Survival Under Conservative Management in Patients with MR According to Baseline Echocardiographic Parameters

*Caption:* This figure shows the survival under conservative management curves according to various echocardiographic parameters of MR severity and LV function.

Abbreviations: LA = Left atrial; LVES = Left Ventricular End-Systolic; LVEF = Left Ventricular Ejection Fraction; LVSV= Left Ventricular Stroke Volume; MR = Mitral Regurgitation.

**Online Figure 3:** Total LVEF, Forward LVEF and GLS before and following MV surgery

*Caption:* This figure shows the changes in total LVEF, forward LVEF and GLS between before the surgery and after the surgery.

Abbreviations: GLS = global longitudinal strain; LVEF = left ventricular ejection fraction

**Online Figure 1:**

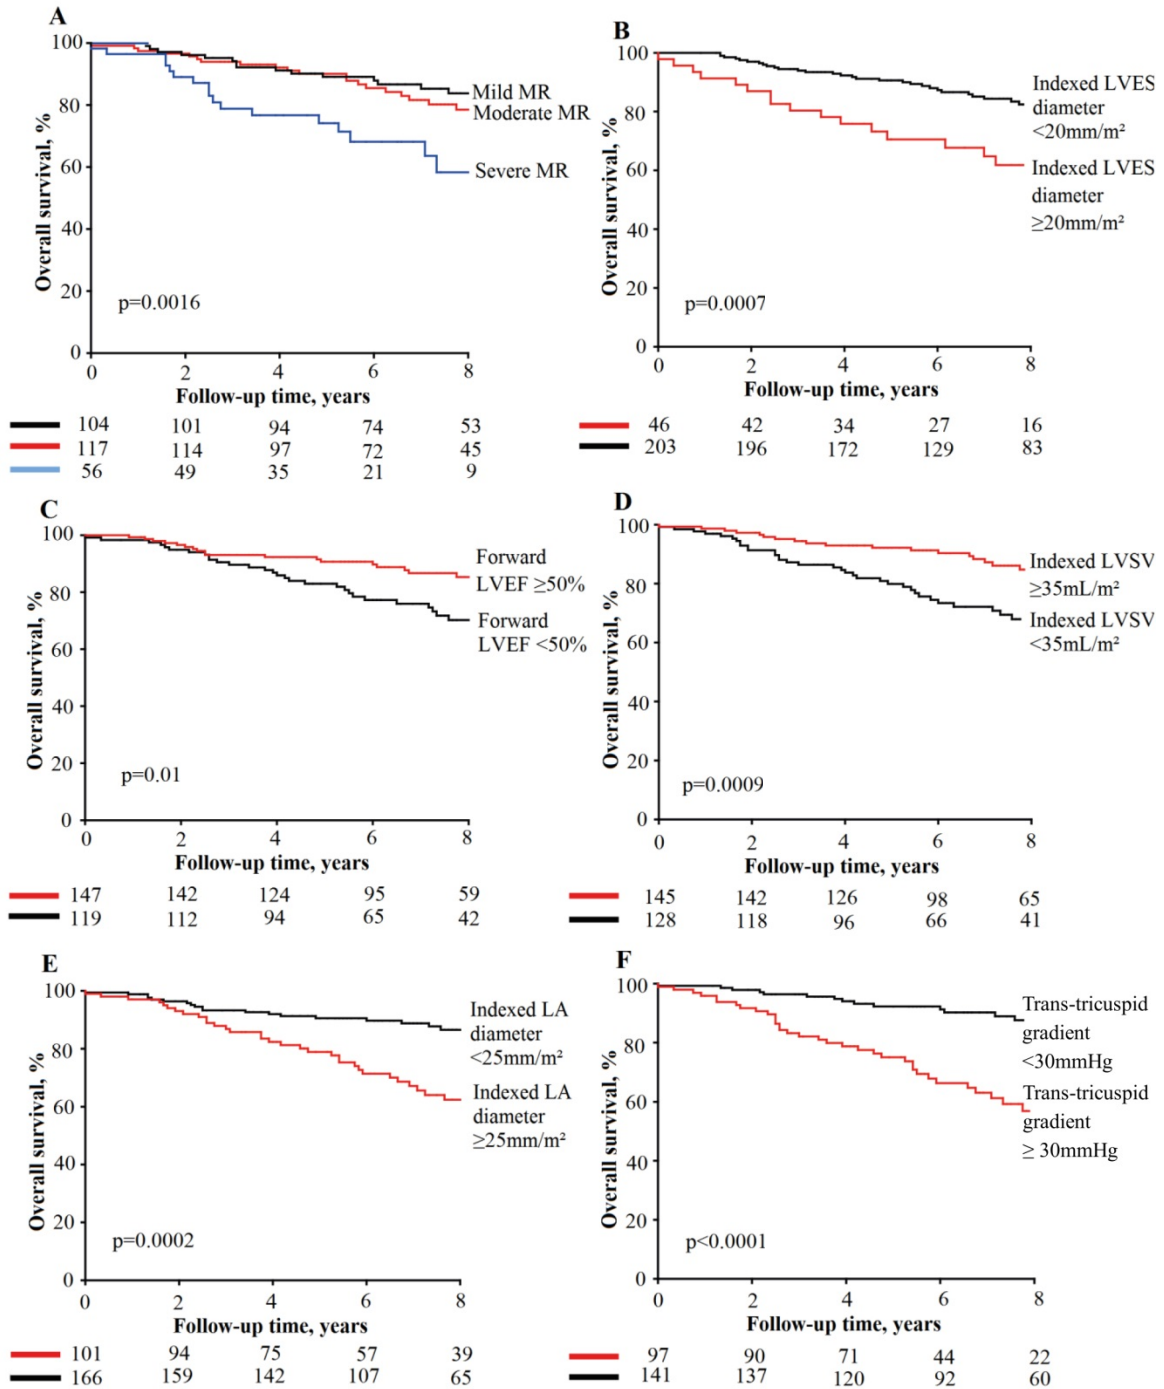

Online Figure 2:

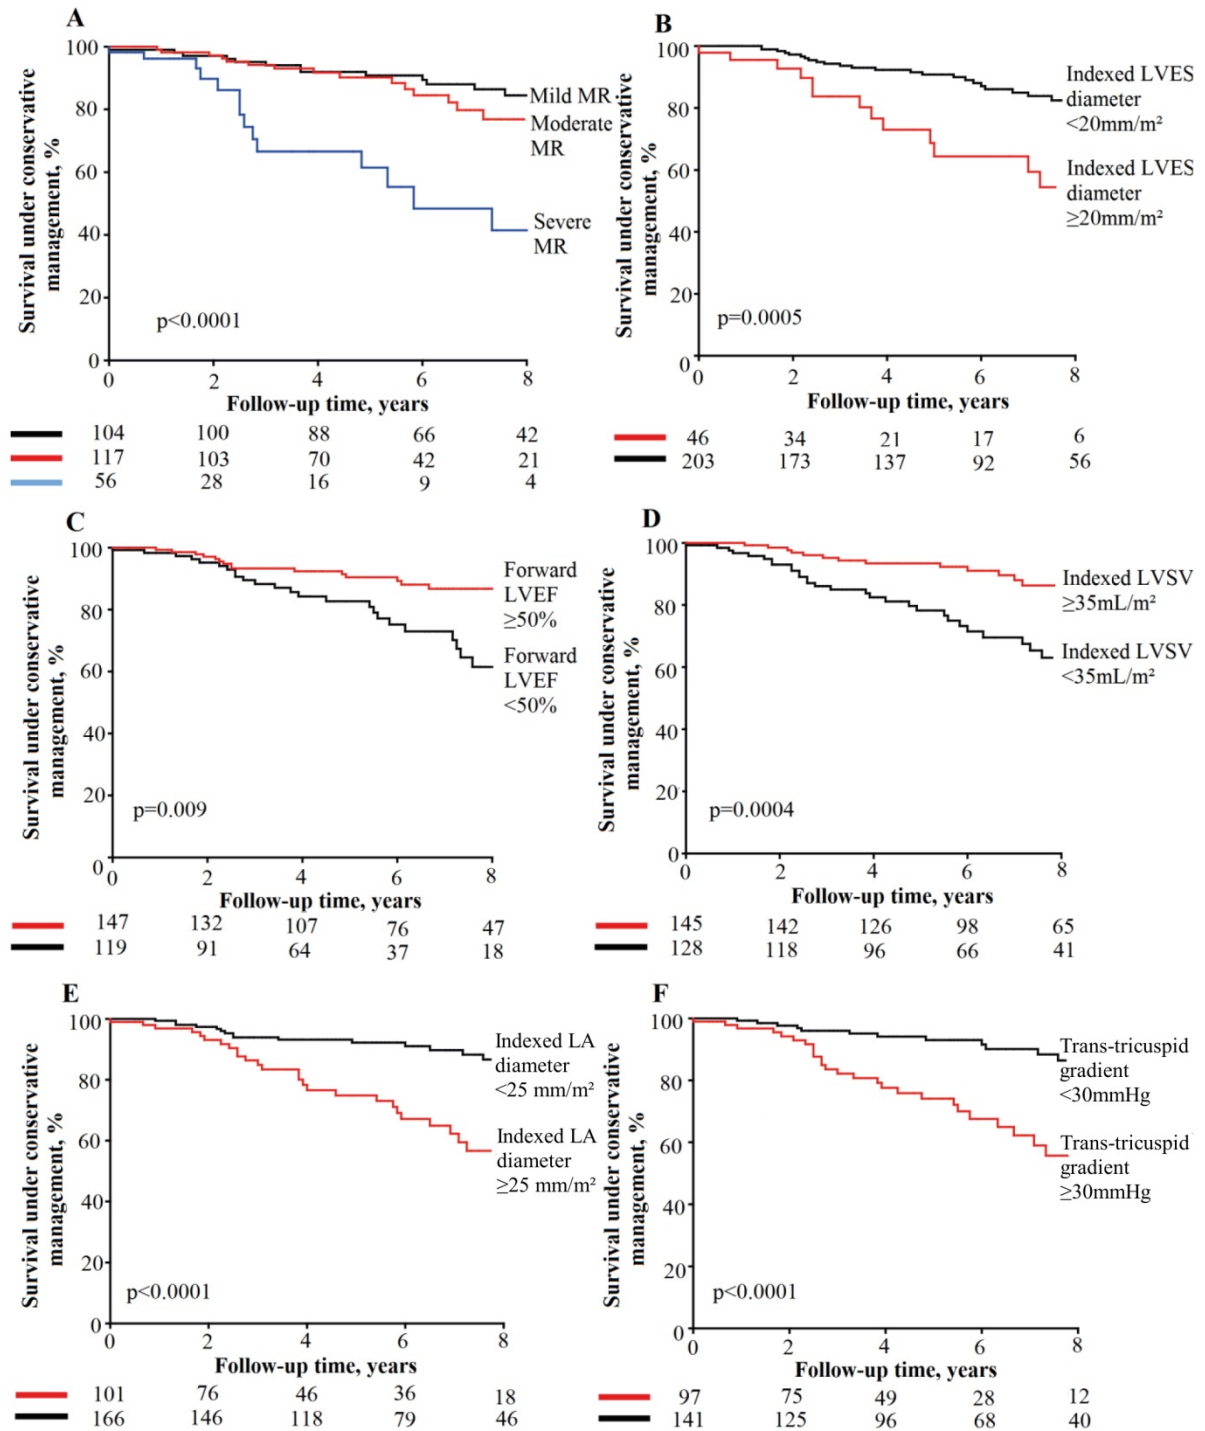

Online Figure 3:

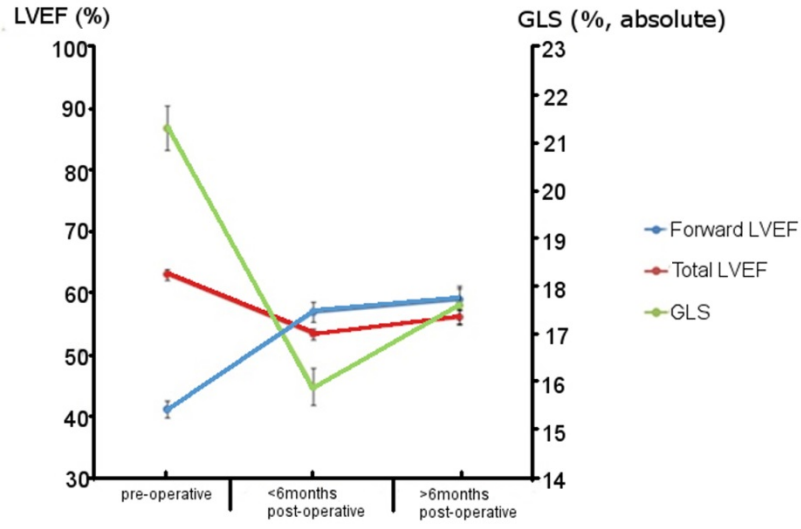

Supplement: JAH3-6-e006309-s001.pdf [file JAH3-6-e006309-s001.pdf]
